# Supplementary material for: Physical Activity Energy Expenditure Predicts Quality of Life in Ambulatory School-Age Children with Cerebral Palsy
Source: MDPI journal article supplement (doi:10.3390/jcm11123362), 2022-06-11
Supplement: s1 [file s1]

**Table S1.** Hierarchical regression analysis results.

|                                | Dependent variable       |       |                           |       |                        |               |                        |       |                       |               |       |
|--------------------------------|--------------------------|-------|---------------------------|-------|------------------------|---------------|------------------------|-------|-----------------------|---------------|-------|
|                                | <u>PedsQL(parent)</u>    |       | <u>PedsQL(parent)</u>     |       | <u>PedsQL(parent)</u>  |               | <u>PedsQL(parent)</u>  |       | <u>PedsQL(parent)</u> |               | VIF   |
|                                | <u>- Physical domain</u> |       | <u>- emotional domain</u> |       | <u>- social domain</u> |               | <u>- school domain</u> |       | <u>- total score</u>  |               |       |
|                                | B                        | beta  | B                         | beta  | B                      | beta          | B                      | beta  | B                     | beta          |       |
| <b>Controlled variables</b>    |                          |       |                           |       |                        |               |                        |       |                       |               |       |
| Unilateral CP                  | -6.016                   | -.125 | 1.318                     | .051  | -14.592                | -.354         | -6.261                 | -.173 | -6.339                | -.227         | 1.943 |
| Girls                          | 6.040                    | .127  | -1.385                    | -.054 | <b>14.388*</b>         | <b>.354*</b>  | 10.639                 | .298  | 7.240                 | .263          | 1.163 |
| GMFCS level_II                 | -31.256                  | -.647 | -1.943                    | -.075 | <b>-23.024*</b>        | <b>-.558*</b> | -9.849                 | -.272 | <b>-18.440*</b>       | <b>-.660*</b> | 2.276 |
| GMFCS level_III                | -45.935                  | -.650 | -9.380                    | -.249 | -21.666                | -.359         | 2.116                  | .040  | <b>-22.267*</b>       | <b>-.545*</b> | 2.293 |
| Overweight                     | .464                     | .007  | -3.919                    | -.104 | -.084                  | -.001         | -6.909                 | -.130 | -2.211                | -.054         | 1.519 |
| <b>Independent variables</b>   |                          |       |                           |       |                        |               |                        |       |                       |               |       |
| PAEE                           | 1.899                    | .108  | -1.774                    | -.188 | -1.334                 | -.089         | 3.459                  | .261  | .737                  | .072          | 3.386 |
| %MVPA                          | -.720                    | -.067 | -.835                     | -.146 | 2.297                  | .252          | -2.211                 | -.276 | -.413                 | -.067         | 3.588 |
| Activity<br>Counts(counts/min) | -.002                    | -.018 | .006                      | .126  | .005                   | .056          | .018                   | .252  | .006                  | .104          | 3.502 |
| R <sup>2</sup>                 | .482                     |       | .093                      |       | .333                   |               | .187                   |       | .442                  |               | -     |

VIF: Variance Inflation factor, CP: cerebral palsy, PedsQL: Pediatric Quality of Life inventory, GMFCS: Gross Motor Function Classification System, PAEE: Physical Activity Energy Expenditure, LPA: Light Physical Activity, MVPA: Moderate to Vigorous Physical Activity  
 \* P < 0.05

B: unstandardized coefficient  
 beta: standardized coefficient

**Table S2.** Hierarchical regression analysis results.

|                             | Dependent variable        |               |                              |       |       |
|-----------------------------|---------------------------|---------------|------------------------------|-------|-------|
|                             | <u>CHQ-PF50- Physical</u> |               | <u>CHQ-PF50-Psychosocial</u> |       | VIF   |
|                             | B                         | beta          | B                            | beta  |       |
| Controlled variables        |                           |               |                              |       |       |
| Unilateral CP               | -3.166                    | -.127         | -3.241                       | -.192 | 1.943 |
| Girls                       | 3.100                     | .126          | -.589                        | -.035 | 1.163 |
| GMFCS level_II              | <b>-10.709*</b>           | <b>-.429*</b> | -3.865                       | -.229 | 2.276 |
| GMFCS level_III             | <b>-24.943*</b>           | <b>-.683*</b> | -1.153                       | -.047 | 2.293 |
| Overweight                  | -2.949                    | -.081         | -4.197                       | -.170 | 1.519 |
| Independent variables       |                           |               |                              |       |       |
| PAEE                        | 2.438                     | .268          | 1.443                        | .235  | 3.386 |
| %MVPA                       | -.487                     | -.088         | -1.000                       | -.268 | 3.588 |
| Activity Counts(counts/min) | .002                      | .043          | .001                         | .019  | 3.502 |
| R <sup>2</sup>              | .593                      |               | .078                         |       | -     |

VIF: Variance Inflation factor, CP: cerebral palsy, CHQ-PF50: Child Health Questionnaire – Parent form 50, GMFCS: Gross Motor Function Classification System, PAEE: Physical Activity Energy Expenditure, LPA: Light Physical Activity, MVPA: Moderate to Vigorous Physical Activity  
 \* P < 0.05

B: unstandardized coefficient  
 beta: standardized coefficient
